# Supplementary material
Source: Springer Nature journal article supplement (https://www.springermedizin.de/resource/supplementary/12885_2009_2155_MOESM11_ESM.pdf/9460644)

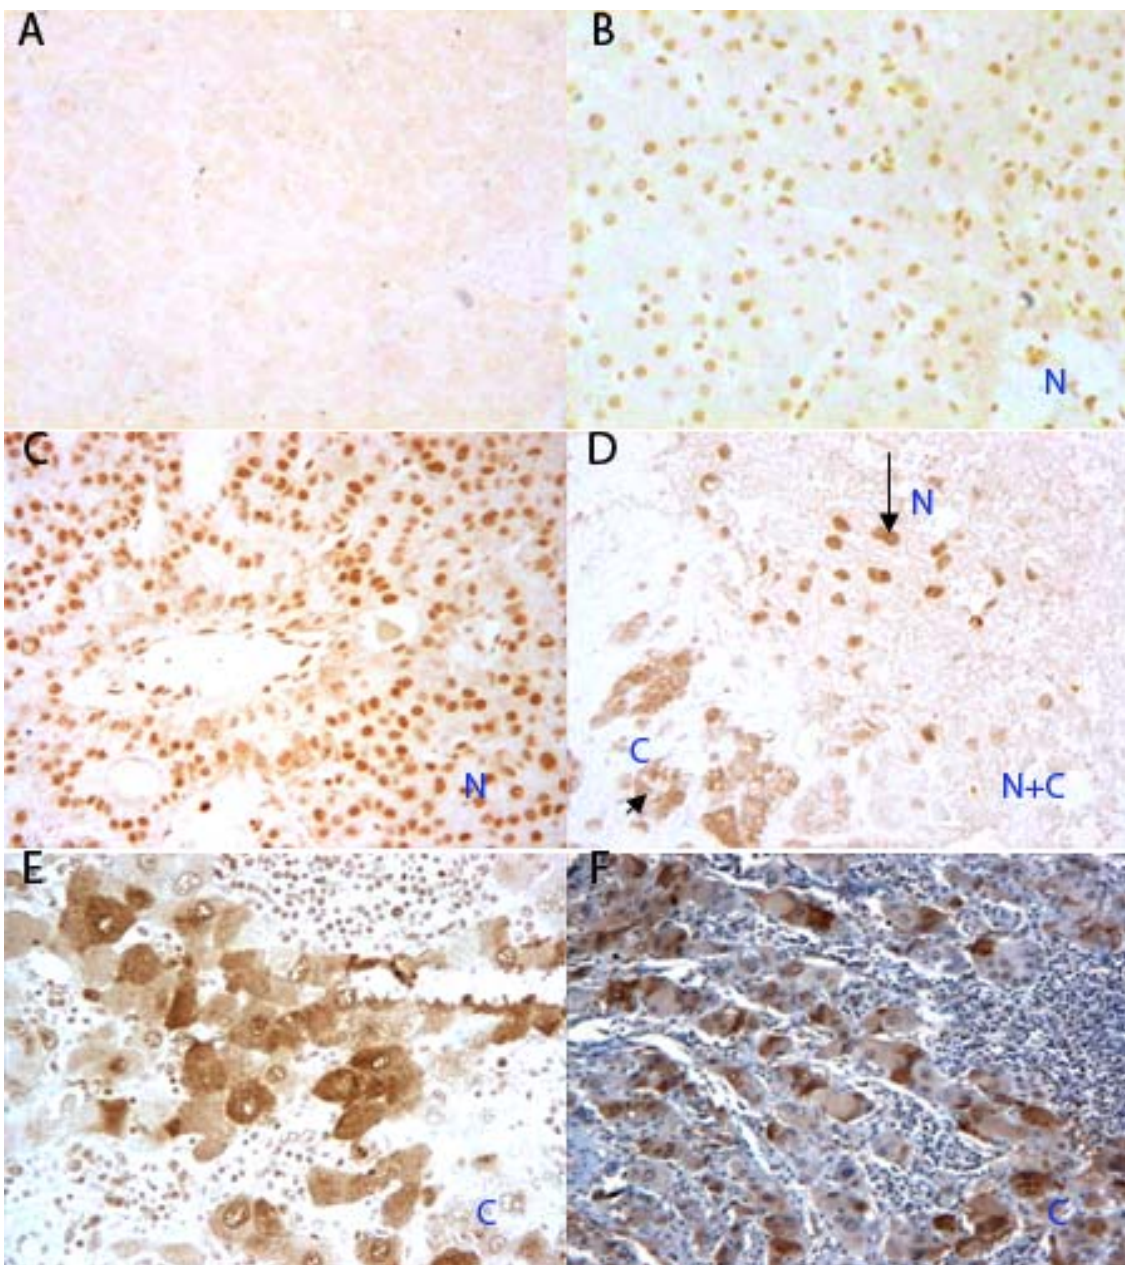

Supplement: MOESM11 [file 9460644]
